# Supplementary material for: Simultaneous removal of acetaminophen, sulfamethoxazole, and iohexol from real wastewater in continuous mode by an immobilized sulfur-doped Bi2O3/MnO2 photocatalyst
Source: Royal Society of Chemistry journal article supplement (doi:10.1039/d4ew00501e), 2024-01-01
Supplement: d4ew00501e1.pdf [file d4ew00501e1.pdf]

## Supporting Information

Simultaneous removal of Acetaminophen, Sulfamethoxazole, and Iohexol from real wastewater in continuous mode by immobilized Sulfur-Doped Bi<sub>2</sub>O<sub>3</sub>/MnO<sub>2</sub> photocatalyst

Vishal Kumar Parida<sup>a,b</sup>, Mario Vino Lincy Gnanaguru<sup>a</sup>, Suneel Kumar Srivastava<sup>c</sup>, Shamik Chowdhury<sup>a</sup>, Ashok Kumar Gupta<sup>d\*</sup>

<sup>a</sup>School of Environmental Science and Engineering,  
Indian Institute of Technology Kharagpur, Kharagpur 721302, India

<sup>b</sup>Amity School of Engineering and Technology,  
Amity University Jharkhand, 834002, India

<sup>c</sup>Department of Chemistry,  
Indian Institute of Technology Kharagpur, Kharagpur 721302, India

<sup>d</sup>Environmental Engineering Division, Department of Civil Engineering,  
Indian Institute of Technology Kharagpur, Kharagpur 721302, India

---

\* Corresponding author.

*E-mail address:* agupta@civil.iitkgp.ac.in (A. K. Gupta).

## Chemicals and reagents

Acetaminophen (ACT,  $C_8H_9NO_2$ ,  $151.1 \text{ g mol}^{-1}$ ), sulfamethoxazole (SMX,  $C_{10}H_{11}N_3O_3S$ ,  $253.3 \text{ g mol}^{-1}$ ), and iohexol (IOX,  $C_{19}H_{26}I_3N_3O_9$ , M.W.:  $821.1 \text{ g mol}^{-1}$ ) of HPLC grade ( $\geq 98\%$  purity), and ciprofloxacin (CIF,  $C_{17}H_{18}FN_3O_3$ ,  $331.3 \text{ g mol}^{-1}$ ) (for toxicity experiments) were procured from Sigma-Aldrich. Humic acid ( $C_9H_9NO_6$ ), sodium dihydrogen phosphate ( $NaH_2PO_4$ ), sodium bicarbonate ( $NaHCO_3$ ), sodium sulfate ( $Na_2SO_4$ ), sodium chloride ( $NaCl$ ), sodium nitrate ( $NaNO_3$ ), magnesium chloride ( $MgCl_2$ ), and calcium chloride ( $CaCl_2$ ), were purchased from Merck, and SRL chemicals for carrying out the co-existing ions and natural organic matter effect experiments. Potassium dichromate solution ( $K_2Cr_2O_7$ ), sulfuric acid ( $H_2SO_4$ ), silver sulfate ( $Ag_2SO_4$ ), and mercuric sulfate ( $HgSO_4$ ) were procured from Sigma-Aldrich and were used for COD experiment. Ascorbic acid ( $C_6H_8O_6$ ), isopropyl alcohol ( $C_3H_8O$ ), Ethylenediaminetetraacetic acid ( $C_{10}H_{16}N_2O_8$ ), and sodium azide ( $NaN_3$ ) were procured from Merck and SRL chemicals for performing radical scavenging experiments. All the chemicals used were of analytical grade ( $\geq 99\%$  purity) and without further purification.

## Analytical methods and characterization techniques

A reversed-phase ultra-high-performance liquid chromatography (UHPLC) system (Ultimate 3000, Thermo Fisher Inc., USA), equipped with a Hypersil GOLD (250 mm  $\times$  4.6 mm) C-18 column as stationary phase, was utilized to determine the residual concentration of ACT, SMX, and IOX in the reaction media. The instrument was operated in gradient mode with a binary mixture of acetonitrile and DI water as the mobile phase (30–65 vol.% acetonitrile), and the flow rate was  $1 \text{ mL min}^{-1}$ . A UV-vis diode array detector was used to detect ACT, SMX, and IOX at 254, 270, and 210 nm, respectively. Liquid chromatography-mass spectrometry (LC-MS) analysis (Waters 2695 XE - separations module equipped with Quattro Micro™ atmospheric pressure ionization (API) mass spectrometer, Waters

Corporation Inc., USA) was carried out to identify the intermediate compounds generated during photocatalytic degradation of ACT-SMX-IOX. The degree of mineralization of ACT, SMX, and IOX was measured using a total organic carbon (TOC) analyzer (TOC-L, Shimadzu Corporation, Japan). Ion chromatography (ICS 2100, Thermo Fisher Scientific Inc., USA) was used to determine the concentration of co-existing ions in the different water matrices tested in this study. The morphology, phase constitution, and surface chemistry of the spent catalyst were analyzed via microscopy and spectroscopy techniques. Fourier transform infrared (FTIR) spectroscopy was conducted using a Bruker Alpha II spectrometer provided by Bruker Corporation, USA. High-resolution field emission gun-scanning electron microscopy (FEG-SEM) was performed on a Zeiss Merlin field emission gun scanning electron microscope. The particle size distribution characteristics of the sand utilized in the FU were analyzed using a Zetasizer Nano ZS90 analyzer provided by Malvern PANalytical Ltd., Switzerland. The elemental composition of the sand grains before and after use as filtration media was approximated using X-ray fluorescence (XRF) spectroscopy (Epsilon 3, Malvern PANalytical Ltd., Switzerland). The concentration of metal ions leaching from the photocatalyst during the treatment process was estimated using inductively coupled plasma optical emission spectroscopy (ICP-OES) (Optima 5300DV, Perkin Elmer, USA). In order to identify the primary reactive oxygen species (ROS) generated upon light exposure, electron paramagnetic resonance (EPR) spectroscopy was performed using an Elexsys 580 EPR spectrometer (Bruker Corporation, Germany).

### **Sampling and analysis**

Real municipal and hospital wastewater samples were collected from the municipal treatment plant in situated in IIT Kharagpur campus, and a nearby sub-division hospital situated in Kharagpur, respectively. The samples were placed in approximately 20-liter containers, filled up to the brim, with no room for air, and subsequently stored in darkness at a temperature of

4°C. Samples were withdrawn from the inlet point of MBBR reactor (feed tank 1), intermediate settling tank (feed tank 2), and the MBBR-FU (feed tank 3) and analysed immediately following collection. The standard methods were employed to assess the physical and chemical attributes of the wastewater.<sup>1</sup> The COD of the wastewater samples was determined using the reflux colorimetric method using a COD digester. (5220 D<sup>1</sup>), and were measured at 420 nm (low COD) and 600 nm (high COD) using a UV-Vis Spectrophotometer (LabIndia 3092 Spectrophotometer, India). Total dissolved solids (TDS) the wastewater samples were calculated using a portable TDS meter. pH and turbidity were measured using pH meter and nephelometer respectively. TSS was measured by passing the sample through 0.45 µm glass microfiber filter paper and then heating the residue on the filter paper in an oven at 103–105 °C, following method 2540 D (APHA, 2017). Anions concentration in the wastewater samples were detected using ion chromatography (IC) (Thermo Fisher India, USA).

### **Synthesis of immobilized photocatalyst**

In this study, 2S-BOMO coated clay beads (2S-BOMO CCB) has been used for ACT-SMX-IOX degradation. The detailed synthesis procedure for S-BOMO nanocomposite and immobilized photocatalysts are discussed in our previous study.<sup>2</sup>

### **Reactor setup and operation**

#### **Continuously-aerated MBBR-FU**

In the MBBR unit the HDPE suspended carriers contributed to a design that promoted optimal surface area for biofilm attachment, and the system was supplemented with sufficient nutrients to enhance the efficiency of the wastewater treatment process. Before introducing real wastewater samples, the MBBR system underwent an essential acclimatization phase by inoculating tap water with activated sludge to make a synthetic wastewater system to

simulate real wastewater conditions (Fig. S2). The synthetic wastewater composed of glucose as carbon source ( $6900 \text{ mg L}^{-1}$ )  $\text{NH}_4\text{Cl}$  ( $2700 \text{ mg L}^{-1}$ ),  $\text{KH}_2\text{PO}_4$  ( $480 \text{ mg L}^{-1}$ ),  $\text{NaHCO}_3$  ( $\text{pH} = 8.5 \pm 0.3$ , to ensure sufficient alkalinity) as well as trace nutrients including,  $\text{MgSO}_4 \cdot 7\text{H}_2\text{O}$  ( $69.5 \text{ mg L}^{-1}$ ),  $\text{CaCl}_2 \cdot 2\text{H}_2\text{O}$  ( $4.8 \text{ mg L}^{-1}$ ),  $\text{MnCl}_2 \cdot 4\text{H}_2\text{O}$  ( $3.6 \text{ mg L}^{-1}$ ),  $\text{ZnSO}_4 \cdot 7\text{H}_2\text{O}$  ( $5.7 \text{ mg L}^{-1}$ ),  $\text{FeCl}_3 \cdot 6\text{H}_2\text{O}$  ( $18.9 \text{ mg L}^{-1}$ ), and  $\text{CuSO}_4 \cdot 5\text{H}_2\text{O}$  ( $5.0 \text{ mg L}^{-1}$ ). In the synthetic wastewater, a chemical oxygen demand (COD) of  $500 \text{ mg L}^{-1}$ ,  $\text{NH}_4^+\text{-N}$  of  $50 \text{ mg L}^{-1}$ , and a C/N ratio of 10 was maintained. During the entire acclimatization period, continuous monitoring of mixed liquor suspended solids (MLSS), organics, nutrients, and solids removal efficiency was performed. An MLSS concentration of  $3500\text{-}4500 \text{ mg L}^{-1}$  was maintained in the MBBR system. Once the removal efficiencies for the organics reached a steady level, it was assumed to be the end-point of the acclimatization period, signifying microbial adaptation to wastewater conditions. Aeration was supplied throughout the reactor at a rate of  $5 \text{ L min}^{-1}$  by an air pump to ensure continuous aerobic conditions within the system (Fig. S2).

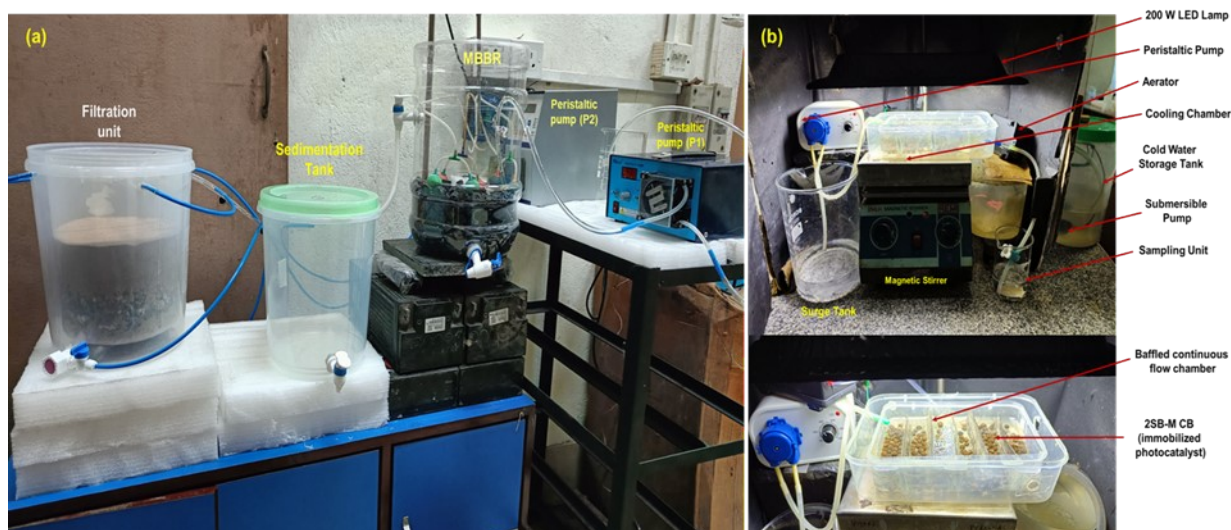

**Fig. S1.** (a) Image of MBBR unit followed by filtration unit. (b) Continuous photocatalytic reactor with immobilized photocatalysts (2S-BOMO CCB).

This aeration strategy was aimed at sustaining a dissolved oxygen (DO) level of approximately  $4$  to  $6 \text{ mg L}^{-1}$  and also to keep the carriers in suspension. The filtration unit

(FU) consisted of a fine sand layer (200-400  $\mu\text{m}$ ) of up to 9 cm (Fig. S3b), which was supported by gravel layers of varied size (2-4, 4-6 and 6-8 mm) (Fig. S3c). This multi-layered arrangement ensures efficient filtration, with each layer contributing to the removal of interfering agents.

### Continuous photocatalytic reactor

To ensure adequate mixing and homogeneity of photocatalyst in the reaction chamber, diffused aerator system was applied in the reaction chamber, followed by slow magnetic stirring. Additionally, aeration may also enhance the dissolved oxygen concentration in the reaction solution, facilitating the generation of more reactive radicals that could further improve the photocatalytic process. The details regarding the light source used in this study are discussed in our previous study <sup>3</sup>.

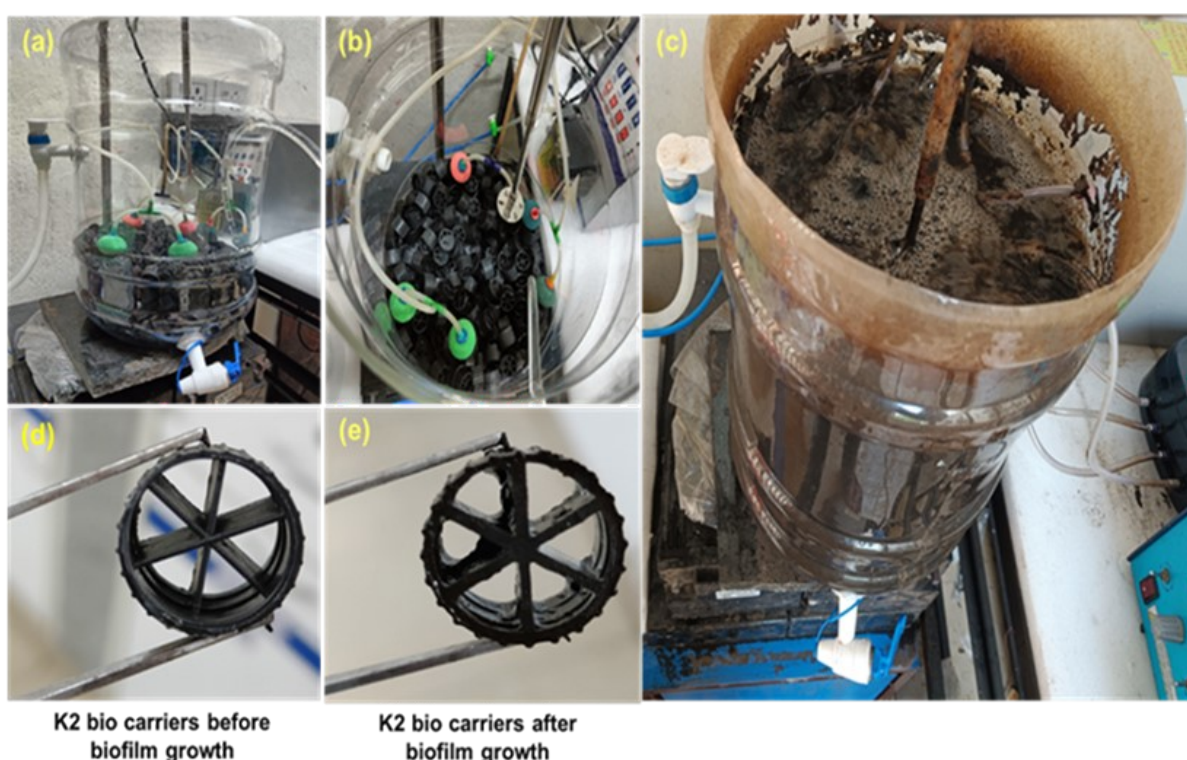

**Fig. S2.** (a) MBBR unit (K2 bio carriers (40% fill ratio)), (b) MBBR unit (aeration pipes). (c) MBBR system during acclimatization period. Kaldnes K2 bio carriers (c) before and (d) after the period of acclimatization.

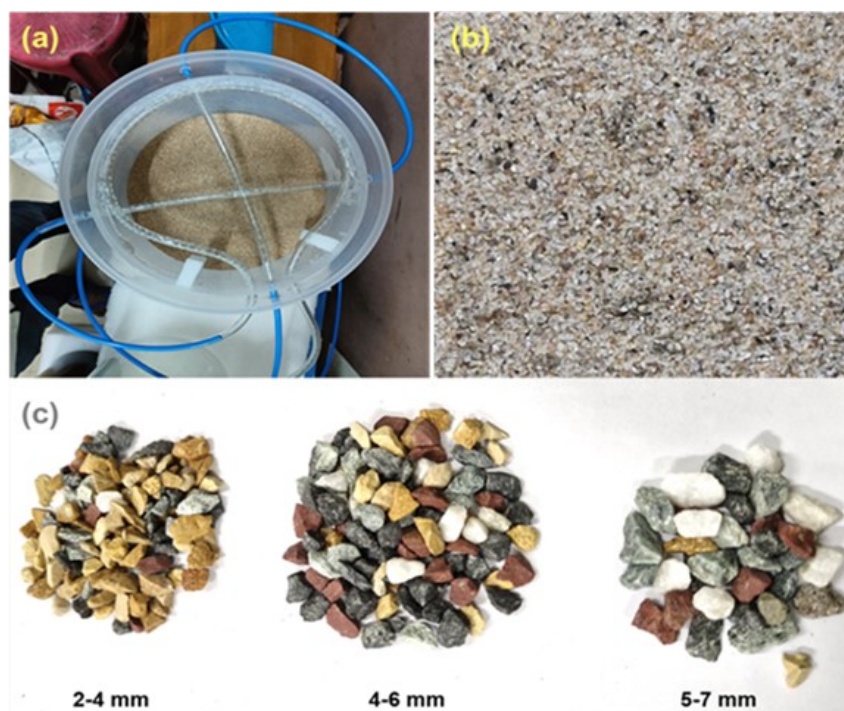

**Fig. S3.** (a) Filtration unit (mesh shape water distribution), (b) siliceous sand (200-400  $\mu\text{m}$ ) used to fill the FU, and (c) coarse aggregates of varied size as support media for sand media.

## Results and discussion

### Synchronous photocatalytic degradation of ACT, SMX, and IOX in continuous mode

In a typical experiment, approximately 200 2S-BOMO CCB were placed in the baffled chamber and equally distributed over each baffled space to ensure a uniform packed-bed type chamber. After that,  $\sim 1$  L of ACT-SMX-IOX solution (with a concentration of  $5 \text{ mg L}^{-1}$  each) was taken in the surge tank. The solution was then pumped into the reactor and allowed to interact with the photocatalyst in the dark for 60 min to achieve adsorption-desorption equilibrium. Thereafter, the system was irradiated for 240 min. The RT of 300 min (including the adsorption phase) was maintained in the rectangular chamber by adjusting the flow rate ( $\sim 3.33 \text{ mL min}^{-1}$ ). After the irradiation period, aliquots were taken from the reactor, and the

residual concentration of each contaminant was analyzed, and the corresponding degradation rate constants were determined.

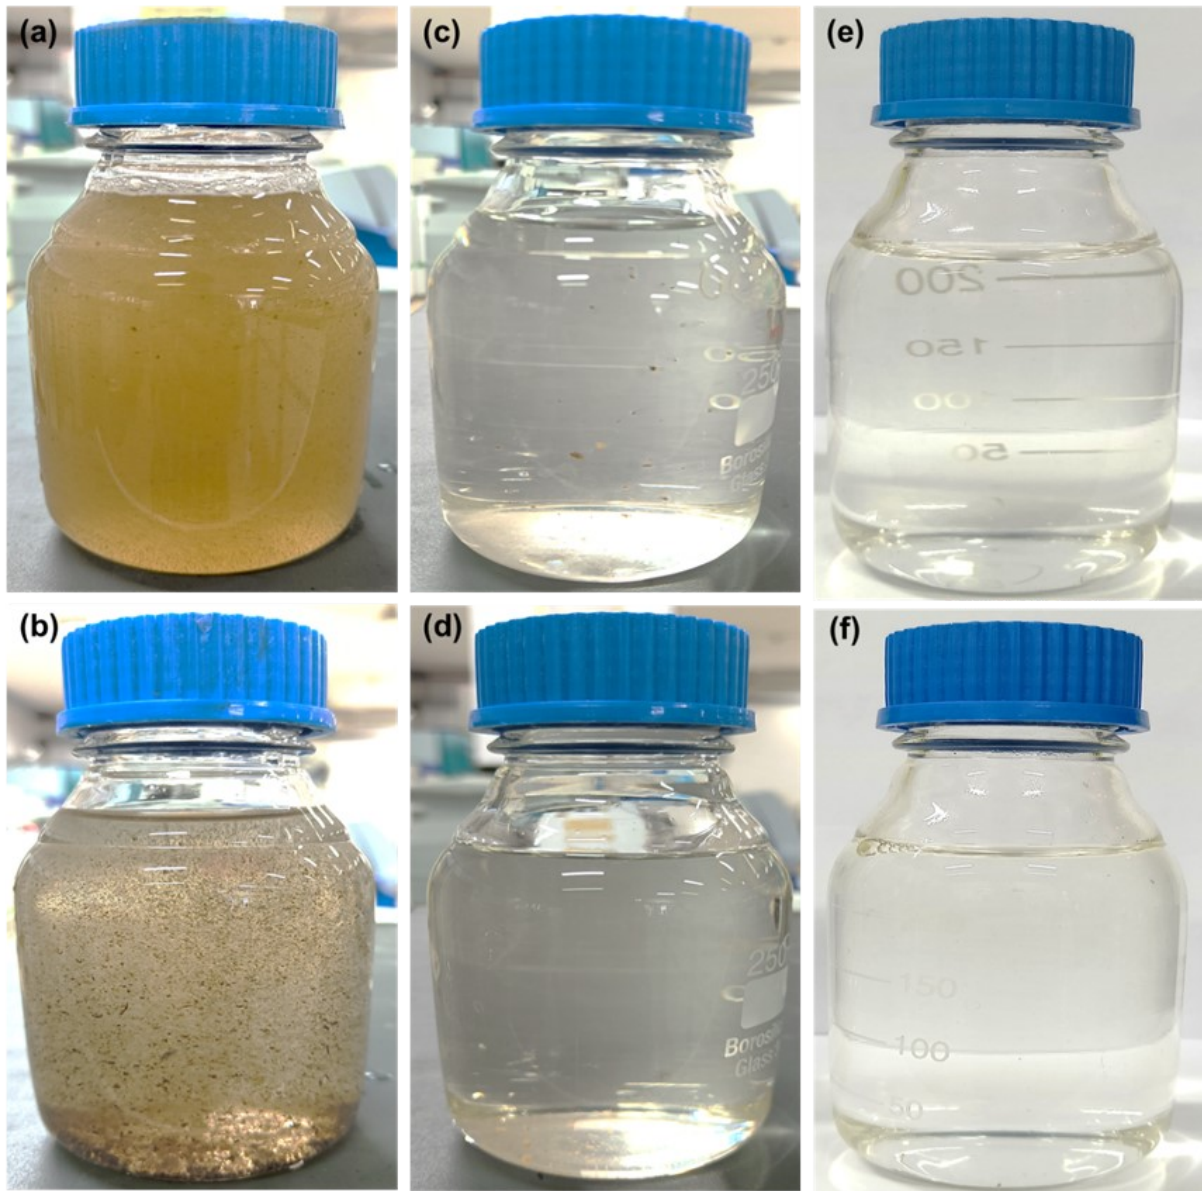

**Fig. S5.** Raw (a) MWW, and (b) HWW. MBBR treated (c) municipal wastewater, and (d) hospital wastewater. (e) MBBR-FU treated (e) municipal wastewater, and (f) hospital wastewater.



**Table S1.** Water quality parameters of real municipal and hospital wastewater used in this study.

| Parameters                                                        | Raw municipal wastewater | Raw hospital wastewater |
|-------------------------------------------------------------------|--------------------------|-------------------------|
| pH                                                                | 6.96 ± 0.1               | 7.25 ± 0.1              |
| Turbidity (NTU)                                                   | 97.5 ± 1.8               | 70.3 ± 1.0              |
| TSS (mg L <sup>-1</sup> )                                         | 161.2 ± 4.7              | 146.2 ± 12.3            |
| TDS (mg L <sup>-1</sup> )                                         | 231.5 ± 24.1             | 347.7 ± 18.7            |
| Chloride (Cl <sup>-</sup> , mg L <sup>-1</sup> )                  | 55.1 ± 5.8               | 70.6 ± 2.8              |
| Bicarbonate (HCO <sub>3</sub> <sup>-</sup> , mg L <sup>-1</sup> ) | 387.8 ± 12.4             | 453.0 ± 36.7            |
| Sulphahte (SO <sub>4</sub> <sup>2-</sup> , mg L <sup>-1</sup> )   | 17.8 ± 1.9               | 30.7 ± 5.7              |
| Total Kjeldahl nitrogen (TKN, mg L <sup>-1</sup> )                | 47.4 ± 3.9               | 21.7 ± 1.1              |
| Nitrate (NO <sub>3</sub> <sup>-</sup> , mg L <sup>-1</sup> )      | 4.7 ± 1.7                | 3.1 ± 1.3               |
| Phosphate (PO <sub>4</sub> <sup>3-</sup> , mg L <sup>-1</sup> )   | 40.6 ± 1.8               | 48.5 ± 2.2              |
| COD (mg L <sup>-1</sup> )                                         | 388.0 ± 20.0             | 310.0 ± 14.0            |

MS2 ES+  
2.79e6

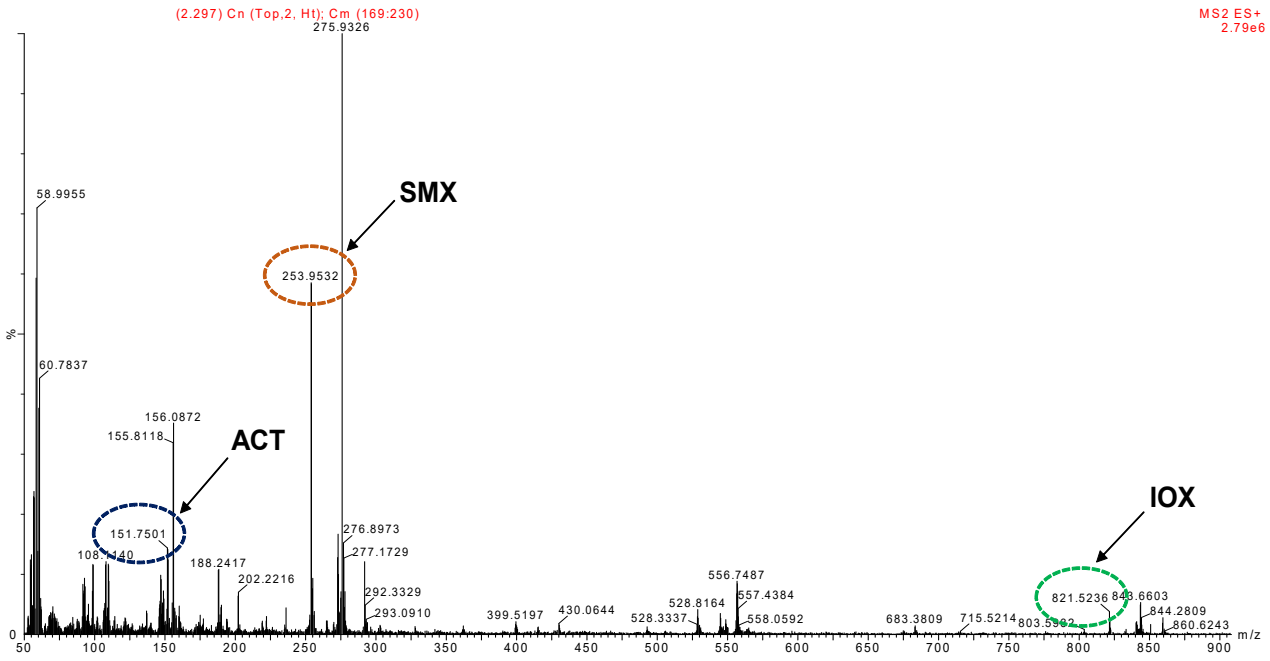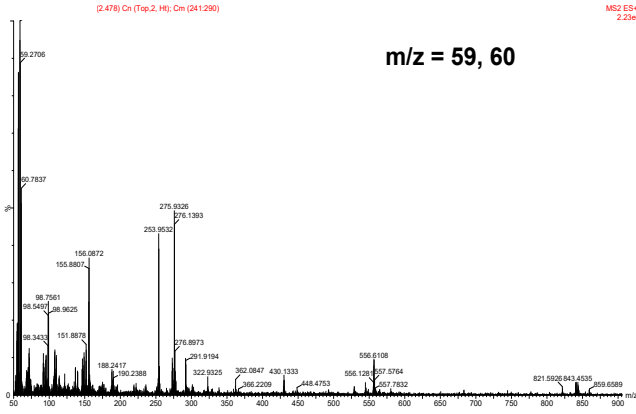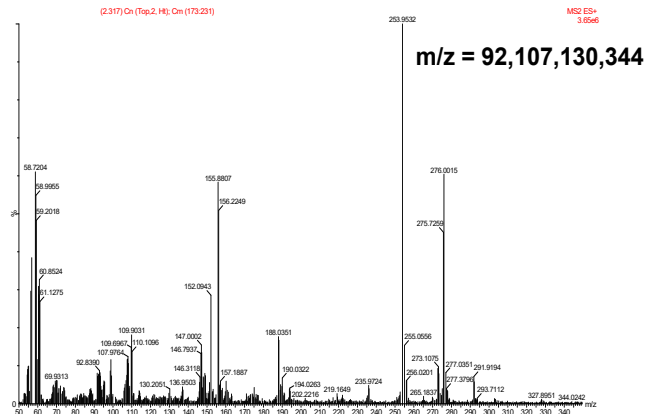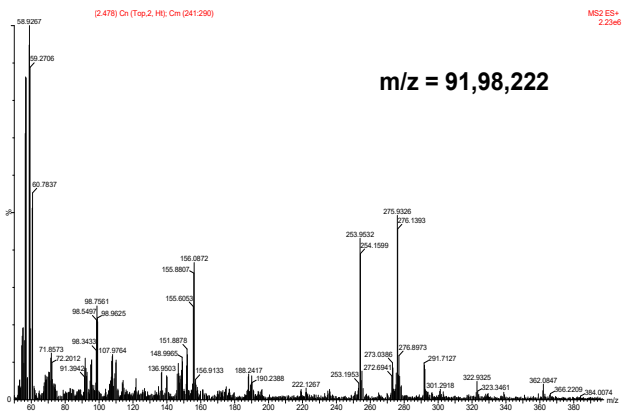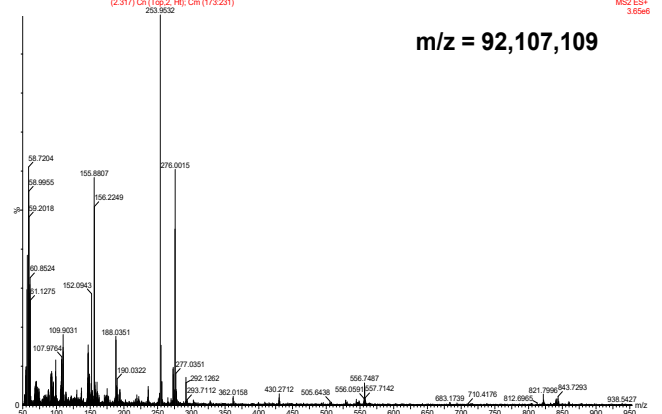

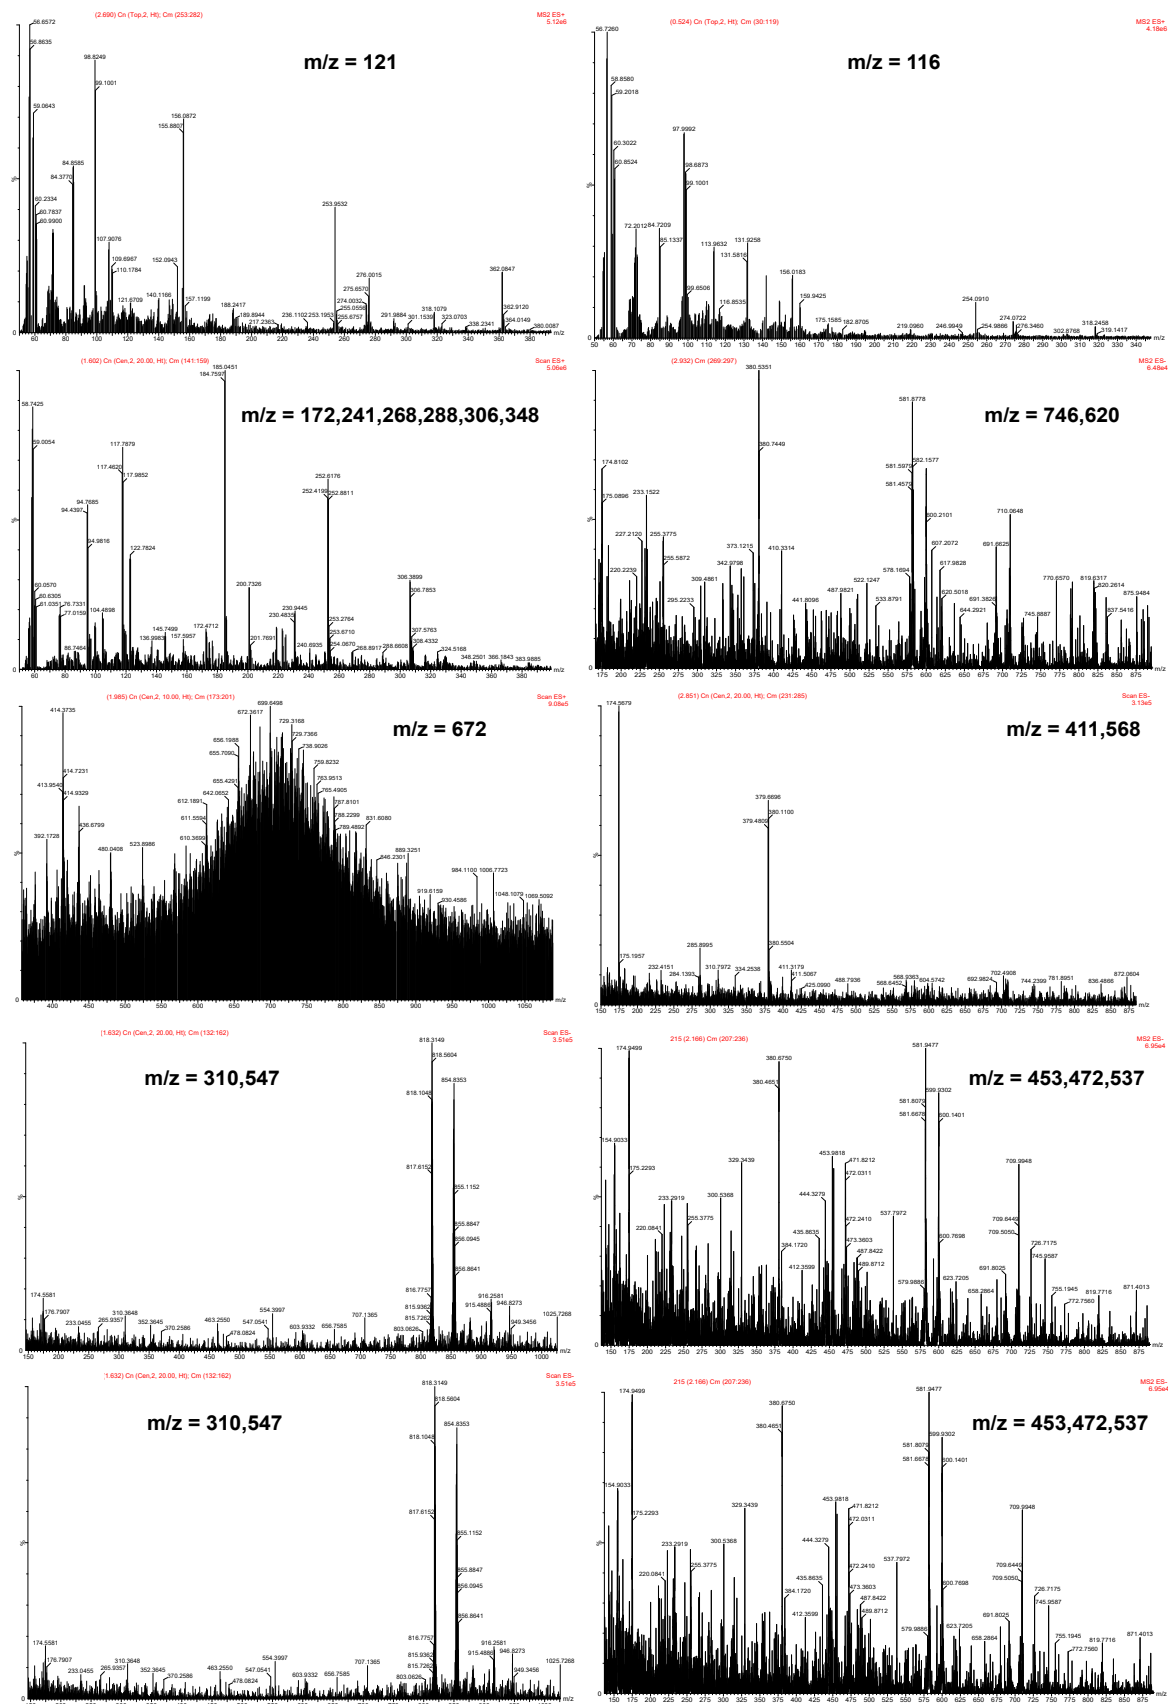

Fig. S6. LC-MS spectra of ACT-SMX-IOX intermediate by-products.

**Table S2.** Toxicity results predicted by T.E.S.T. software of the ACT, SMX and IOX and their intermediates.

| <b>Compound name</b> | <b>Molecular mass</b> | <b>Fathead LC<sub>50</sub> (96 h) (mg L<sup>-1</sup>)</b> | <b>Daphnia LC<sub>50</sub> (48 h) (mg L<sup>-1</sup>)</b> | <b>Oral rat LD<sub>50</sub> (mg kg<sup>-1</sup>)</b> | <b>Developmental toxicity</b> | <b>Mutagenicity</b> |
|----------------------|-----------------------|-----------------------------------------------------------|-----------------------------------------------------------|------------------------------------------------------|-------------------------------|---------------------|
| ACT                  | 151.1                 | 89.69                                                     | 27.14                                                     | 1684.75                                              | Non-toxicant (0.46)           | Negative (0.45)     |
| TPA5                 | 122                   | 25.2                                                      | 38.82                                                     | 3128.12                                              | Non-toxicant (0.46)           | Negative (0)        |
| TPA6                 | 116                   | 462.48                                                    | 410.27                                                    | 828.18                                               | Toxicant (0.72)               | Negative (0.26)     |
| TPA3                 | 109                   | 250.55                                                    | 4.36                                                      | 216.36                                               | Toxicant (0.57)               | Negative (0.44)     |
| TPA1                 | 108                   | 31.96                                                     | 63.64                                                     | -                                                    | Toxicant (0.61)               | Negative (0.16)     |
| TPA4                 | 106                   | 9.72                                                      | 16.57                                                     | 1393.53                                              | Non-toxicant (0.24)           | Negative (0.23)     |
| TPA9                 | 90                    | 702.23                                                    | 1445.45                                                   | 1415.78                                              | Toxicant (0.56)               | Negative (0.3)      |
| TPA10                | 89                    | 578.76                                                    | 308.54                                                    | 1434.66                                              | Toxicant (0.62)               | Negative (0.2)      |
| TPA11                | 73                    | 368.37                                                    | 44.98                                                     | 333.87                                               | Toxicant (0.54)               | Negative (0.04)     |
| TPA7                 | 60                    | 762.37                                                    | 1035.97                                                   | 3467.62                                              | Toxicant (0.71)               | Negative (-0.06)    |
| TPA2                 | 59                    | 1092.96                                                   | 353.09                                                    | 1829.99                                              | Toxicant (0.64)               | Negative (-0.04)    |
| TPA8                 | 74                    | 181.02                                                    | 1491.62                                                   | 945.75                                               | Toxicant (0.58)               | Positive (0.53)     |
| <b>SMX</b>           | 253.27                | -                                                         | -                                                         | 8549.94                                              | Toxicant (0.85)               | Negative (-0.04)    |
| TPS1                 | 287                   | -                                                         | -                                                         | -                                                    | Toxicant (0.79)               | -                   |
| TPS2                 | 269                   | -                                                         | -                                                         | 4851.33                                              | Toxicant (0.8)                | Negative (-0.14)    |
| TSP3                 | 241                   | -                                                         | -                                                         | N/A                                                  | Toxicant (0.91)               | Negative (-0.2)     |
| TSP4                 | 197                   | -                                                         | -                                                         | -                                                    | Toxicant (0.71)               | Negative (0.06)     |
| TSP5                 | 173                   | 152.79                                                    | -                                                         | 4269.24                                              | Non-toxicant (0.45)           | Negative (0.21)     |

|            |       |       |         |         |                     |                 |
|------------|-------|-------|---------|---------|---------------------|-----------------|
| TSP10      | 158   | 62.14 | -       | 2474.44 | Non-toxicant (0.49) | Negative (0.25) |
| TSP8       | 132   | -     | 1242.62 | N/A     | Toxicant (0.54)     | -               |
| TSP6       | 109   | 75.33 | 3.34    | 406.69  | Toxicant (0.57)     | Negative (0.26) |
| TSP7       | 98    | 423.5 | 22.11   | -       | Non-toxicant (0.33) | Negative (0.39) |
| TSP9       | 93    | 80.87 | 2.97    | 372.73  | Toxicant (0.53)     | Negative (0.36) |
| <b>IOX</b> | 821.1 | 0.6   | -       | -       | Toxicant (0.75)     | Negative (0.28) |
| TPI1       | 747   | N/A   | -       | -       | Toxicant (0.79)     | -               |
| TPI3       | 673   | 0.1   | -       | -       | Toxicant (1.08)     | -               |
| TPI5       | 621   | 1.12  | -       | -       | Toxicant (0.78)     | -               |
| TPI2       | 569   | 35.43 | -       | -       | Toxicant (0.68)     | Negative (0.27) |
| TPI4       | 547   | 0.41  | -       | -       | Toxicant (1.07)     | -               |
| TPI8       | 537   | 14.09 | -       | -       | Toxicant (0.7)      | -               |
| TPI10      | 453   | 33.84 | -       | -       | Toxicant (0.88)     | -               |
| TPI9       | 411   | 34.18 | 2549.86 | -       | Toxicant (0.55)     | Negative (0.05) |
| TPI6       | 347   | 18.04 | -       | -       | Toxicant (1.05)     | Negative (0.07) |
| TPI11      | 344   | 70.78 | 477.64  | 7650.5  | Toxicant (0.67)     | Negative (0.32) |
| TPI13      | 311   | 83.79 | 572.99  | -       | Toxicant (0.75)     | Negative (0.31) |
| TPI7       | 305   | 21.92 | -       | -       | Toxicant (0.93)     | Negative (0.13) |
| TPI12      | 221   | 47.22 | 110.19  | 532.8   | Toxicant (0.82)     | Negative (0.32) |

---

## Degree of mineralization of ACT-SMX-IOX

The mineralization efficiency of 2S-BOMO immobilized photocatalysts were measured by determining the reduction in the total organic carbon (TOC) of the ACT-SMX-IOX solution ( $5 \text{ mg L}^{-1}$ ). The TOC content was reduced to 62.4% after 300 min of photocatalysis in continuous mode. The results can be explained by the fact that during photocatalytic degradation, the target pollutant produces a number of low molecular mass intermediates, dimers, and trimers that considerably increase the TOC content. Further, the higher residual TOC content suggests that ACT-SMX-IOX molecules are successfully mineralized to lower molar mass intermediate by-products and finally to  $\text{H}_2\text{O}$  and  $\text{CO}_2$ .

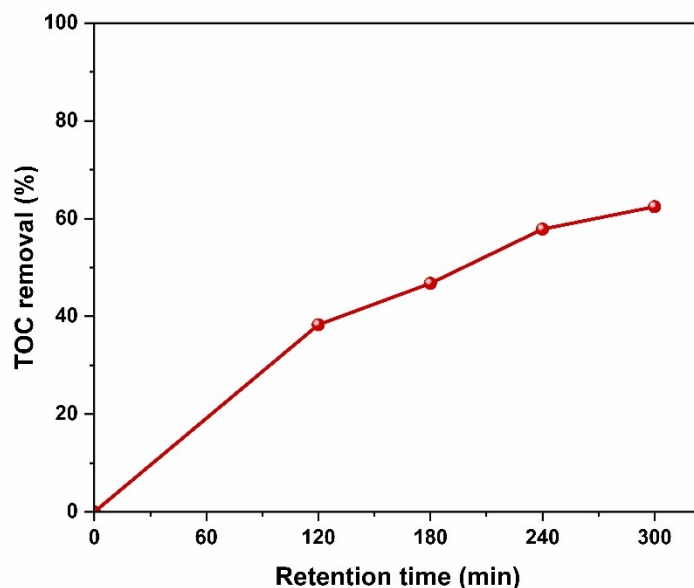

**Fig. S7.** TOC removal with respect to RT for simultaneous photocatalytic degradation of ACT, SMX, and IOX mixture over 2S-BOMO immobilized photocatalyst.

### Cost and economics analysis

The reagents and chemicals used for the synthesis of immobilized photocatalyst for ACT-SMX-IOX degradation in the aqueous medium were purchased from Sisco Research Laboratories Pvt. Ltd., India, and Merck Millipore, India. To synthesize 2S-Bi<sub>2</sub>O<sub>3</sub> and 2S-BOMO, we considered the cost of raw materials for preparing these substances in bulk. This approach reduces the overall cost of the materials, as the instrument cost remains constant regardless of whether the materials are prepared in bulk or in less quantity.

**Table S3:** Detailed cost analysis for the photocatalytic material synthesis and complete treatment process.

| <b>Instrument usage cost</b>                                                              | <b>Power consumption (kW)</b> | <b>Operational time (h)</b>   | <b>Cost (\$) per kWh</b> | <b>Total cost (\$)</b> |
|-------------------------------------------------------------------------------------------|-------------------------------|-------------------------------|--------------------------|------------------------|
| Sonicator                                                                                 | 0.250                         | 1                             | 0.085                    | 0.021                  |
| Muffle furnace (2S-Bi <sub>2</sub> O <sub>3</sub> )                                       | 3                             | 4                             | 0.085                    | 1.020                  |
| Muffle furnace (Clay beads)                                                               | 3                             | 5                             | 0.085                    | 1.275                  |
| Hot air oven                                                                              | 1.500                         | 10                            | 0.085                    | 1.275                  |
| Centrifuge                                                                                | 1                             | 1                             | 0.085                    | 0.085                  |
| Magnetic stirring (2S-Bi <sub>2</sub> O <sub>3</sub> )                                    | 0.01                          | 1                             | 0.085                    | 0.001                  |
| Magnetic stirring (2S-BOMO)                                                               | 0.01                          | 1                             | 0.085                    | 0.001                  |
| <b>Chemicals acquired</b>                                                                 | <b>Quantity</b>               | <b>Cost per quantity (\$)</b> |                          | <b>Total cost (\$)</b> |
| <b>For 2S-Bi<sub>2</sub>O<sub>3</sub> (~60 g)</b>                                         |                               |                               |                          |                        |
| Bismuth (III) nitrate pentahydrate (Bi(NO <sub>3</sub> ) <sub>3</sub> ·5H <sub>2</sub> O) | 65 g                          | 38.4 per 500 g                |                          | 4.99                   |
| Thiourea (CH <sub>4</sub> N <sub>2</sub> S)                                               | 0.31 g                        | 7.4 per 500 g                 |                          | 0.004                  |
| Sodium hydroxide (NaOH)                                                                   | 20 g                          | 3.7 per 500 g                 |                          | 0.148                  |
| Nitric acid (HNO <sub>3</sub> )                                                           | 75 mL                         | 7.4 per 1000 mL               |                          | 0.555                  |
| Total material cost incurred for 2S-Bi <sub>2</sub> O <sub>3</sub> synthesis              |                               |                               |                          | 5.697                  |
| Total instrument cost for 2S-Bi <sub>2</sub> O <sub>3</sub> synthesis                     |                               |                               |                          | 2.130                  |
| Total cost incurred for 2S-Bi <sub>2</sub> O <sub>3</sub> synthesis (~60 g)               |                               |                               |                          | 7.827                  |
| <b>For 2S-BOMO (~16 g)</b>                                                                |                               |                               |                          |                        |
| Potassium permanganate (KMnO <sub>4</sub> )                                               | 15.8 g                        | 8.3 per 500 g                 |                          | 0.262                  |

|                                                                                                                                                             |      |                  |              |
|-------------------------------------------------------------------------------------------------------------------------------------------------------------|------|------------------|--------------|
| Rochelle salt<br>( $\text{KNaC}_4\text{H}_4\text{O}_6 \cdot 4\text{H}_2\text{O}$ )                                                                          | 35 g | 12.6 per 500 g   | 0.882        |
| Sodium hydroxide (NaOH)                                                                                                                                     | 12 g | 3.7 per 500 g    | 0.088        |
| 2S-Bi <sub>2</sub> O <sub>3</sub>                                                                                                                           | 8 g  | 7.8 per 60 g     | 1.040        |
|                                                                                                                                                             |      |                  | 2.272        |
| Total instrument cost incurred for 2S-BOMO synthesis                                                                                                        |      |                  | 1.230        |
| Total cost incurred for 2S-BOMO synthesis (~16 g)<br>(1:1 portion of 2S-Bi <sub>2</sub> O <sub>3</sub> and MnO <sub>2</sub> were taken to prepared 2S-BOMO) |      |                  | 3.502        |
| <b>Total cost incurred for 2S-BOMO synthesis (1 g)</b>                                                                                                      |      |                  | <b>0.218</b> |
| <b>For clay beads (~1000 beads, 100 g mixture)</b>                                                                                                          |      |                  |              |
| Local clay                                                                                                                                                  | 70 g | 0.72 per 1000 g  | 0.050        |
| Bentonite clay                                                                                                                                              | 20 g | 5.4 per 1000 g   | 0.108        |
| White cement                                                                                                                                                | 10 g | 10.7 per 50000 g | 0.002        |
|                                                                                                                                                             |      |                  | 0.160        |
| Total instrument cost incurred for preparing 2S-BOMO immobilized clay beads                                                                                 |      |                  | 2.260        |
| Total cost incurred for preparing 2S-BOMO immobilized clay beads (~1000 nos.)                                                                               |      |                  | 2.420        |
| <b>Total cost incurred for preparing 2S-BOMO immobilized clay beads<br/>(~200 nos.)</b>                                                                     |      |                  | <b>0.484</b> |



| <b>Capital Cost</b>            |                                                                                                                           |                               |                        |
|--------------------------------|---------------------------------------------------------------------------------------------------------------------------|-------------------------------|------------------------|
|                                | <b>Quantity</b>                                                                                                           | <b>Cost per quantity (\$)</b> | <b>Total Cost (\$)</b> |
| <b>MBBR + Filtration unit</b>  | <b>Reactor fabrication cost</b>                                                                                           |                               |                        |
|                                |                                                                                                                           |                               | 23.94                  |
|                                | Cost involved in the fabrication of the MBBR-FU unit with a working volume of ~14 L (MBBR) including piping and fittings  |                               |                        |
|                                | Cost of the K2 carriers with 40% filling ratio                                                                            | 200 nos.<br>(5.5L)            | 0.0075/nos<br>1.49     |
|                                | Aerator cost                                                                                                              | 1                             | 14.37<br>14.37         |
|                                | <b>Cost of raw material used</b>                                                                                          |                               |                        |
|                                | Gravel                                                                                                                    | 2 kg                          | 0.72/kg<br>1.44        |
|                                | River sand                                                                                                                | 5 kg                          | 0.036/kg<br>0.18       |
| <b>Photocatalytic reactor</b>  |                                                                                                                           |                               |                        |
|                                |                                                                                                                           |                               | 11.97                  |
|                                | Cost involved in the fabrication of the photocatalytic reactor with a working volume of 1 L including piping and fittings |                               |                        |
|                                | LED Light cost (200 W)                                                                                                    | 1                             | 10.78<br>10.78         |
| <b>Total capital cost (\$)</b> |                                                                                                                           |                               | <b>64.17</b>           |

---

| <b>Operational Cost</b>                                           |                                            |                 |                               |                             |                          |                      |
|-------------------------------------------------------------------|--------------------------------------------|-----------------|-------------------------------|-----------------------------|--------------------------|----------------------|
|                                                                   |                                            | <b>Quantity</b> | <b>Power consumption (kW)</b> | <b>Operational time (h)</b> | <b>Cost (\$) per kWh</b> | <b>Total cost \$</b> |
| <b>MBBR + FU (Working volume: ~14 L)</b>                          | Peristaltic pump (MBBR) (1 run)            | 1               | 0.05                          | 8                           | 0.085                    | 0.034                |
|                                                                   | Peristaltic pump (FU) (1 run)              | 1               | 0.05                          | 1                           | 0.085                    | 0.004                |
|                                                                   | Aeration pump (1 run)                      | 1               | 0.005                         | 8                           | 0.085                    | 0.003                |
| <b>Photocatalytic reactor (Working volume: 1 L)</b>               | Visible-light irradiation energy (14 runs) | 1               | 0.2                           | 14×4                        | 0.085                    | 0.952                |
|                                                                   | Aeration pump (14 runs)                    | 1               | 0.005                         | 14×5                        | 0.085                    | 0.030                |
|                                                                   | Peristaltic pump (14 runs)                 | 1               | 0.005                         | 14×5                        | 0.085                    | 0.030                |
|                                                                   | Submersible pump (14 runs)                 | 1               | 0.0002                        | 14×4                        | 0.085                    | 0.001                |
| <b>Total operation cost (\$)</b>                                  |                                            |                 |                               |                             |                          | <b>1.054</b>         |
| <b>Treatment cost (\$)/L with treatment of 14 L of wastewater</b> |                                            |                 |                               |                             |                          | <b>0.076</b>         |

---

To prepare 2S-BOMO immobilized clay beads, roughly 1 g of the 2S-BOMO material is needed to coat approximately 200 immobilized clay beads (~6.45 mm diameter). These beads have the capacity to degrade approximately 1 L of ACT-SMX-IOX solution (5 mg L<sup>-1</sup> of each) with a dose of 1 g L<sup>-1</sup> of 2S-BOMO. It should be noted that performing experiments with immobilized photocatalysts is very convenient (i.e., recovery of the immobilized beads from reaction solution). Once the beads are placed in the photocatalytic reactor and these beads can be used for 5 to 6 photocatalytic runs continuously without much material loss.

## References

- 1 APHA, *Standard methods for the examination of water and wastewater*, American Public Health Association, 23rd edn., 2017.
- 2 V. K. Parida, S. K. Srivastava, S. Chowdhury and A. K. Gupta, Visible light-assisted degradation of sulfamethoxazole on 2D/0D Sulfur-Doped Bi<sub>2</sub>O<sub>3</sub>/MnO<sub>2</sub> Z-Scheme heterojunction immobilized photocatalysts, *Langmuir*, 2023, **39**, 18846–18865.
- 3 V. K. Parida, S. K. Srivastava, S. Chowdhury and A. K. Gupta, Facile synthesis of 2D/0D Bi<sub>2</sub>O<sub>3</sub>/MnO<sub>2</sub> Z-scheme heterojunction for enhanced visible light-assisted photocatalytic degradation of acetaminophen, *Chem. Eng. J.*, 2023, **472**, 144969.
